# Supplementary material
Source: PubMed Central journal article supplement (PMC4540666)

Figure S1

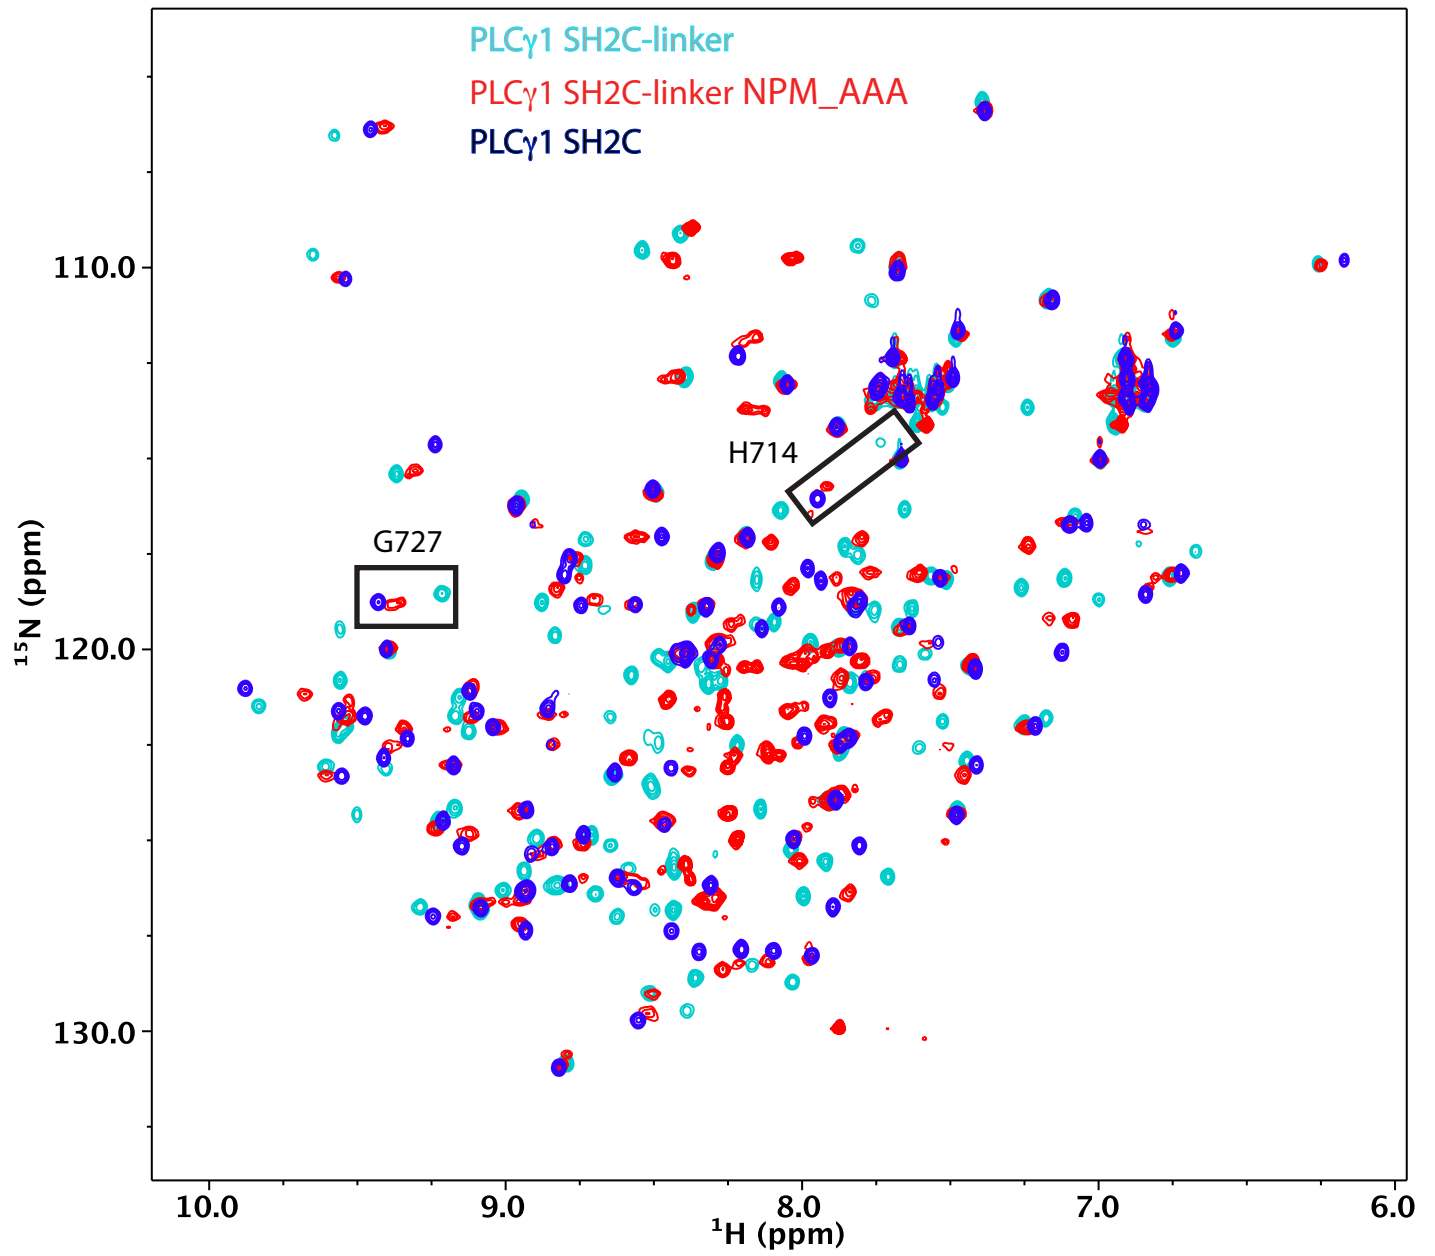

Supplement: NIHMS684665-supplement.pdf [file NIHMS684665-supplement.pdf]
